# Supplementary material
Source: HighWire-hosted journal article supplement (http://ajnr-stage2.highwire.org/highwire/filestream/98599/field_highwire_adjunct_files/0/1227.pdf)
Supplement: 1227.pdf [file 1227.pdf]

**Online Table 1:** Demographics, clinical indication, and clinical CT findings of the patient cohort.

| <b>Patient</b> | <b>Age</b> | <b>Gender</b> | <b>Clinical indication</b>                        | <b>Imaging findings on clinical EID-CT exam</b>                    |
|----------------|------------|---------------|---------------------------------------------------|--------------------------------------------------------------------|
| 1              | 69         | F             | Hearing loss                                      | Normal exam                                                        |
| 2              | 49         | F             | Enhancement within round window on prior MRI      | Soft tissue opacification in round window niche                    |
| 3              | 74         | F             | Hearing loss, rule out cholesteatoma              | Possible cholesteatoma, contralateral otomastoiditis               |
| 4              | 46         | M             | Hearing loss, rule out otosclerosis               | Right fenestral otosclerosis                                       |
| 5              | 43         | M             | Hearing loss, status post stapes surgery          | Bilateral fenestral otosclerosis; Right stapes prosthesis          |
| 6              | 53         | M             | Evaluate left stapes piston                       | Normal prosthesis position                                         |
| 7              | 66         | M             | Hearing loss                                      | Partial opacification both middle ears                             |
| 8              | 71         | F             | Assess for superior semicircular canal dehiscence | No dehiscence present                                              |
| 9              | 83         | F             | Right sided otalgia                               | Several opacified mastoid air cells without coalescent mastoiditis |
| 10             | 64         | F             | Post-operative follow-up                          | Changes from cholesteatoma resection                               |
| 11             | 70         | M             | Assess for superior semicircular canal dehiscence | Left superior semicircular canal dehiscence                        |
| 12             | 84         | M             | Hearing loss                                      | Normal exam                                                        |
| 13             | 55         | F             | Ear pain, post-operative                          | Expected changes related to prior tympanomastoidectomy             |
